# Supplementary material
Source: PubMed Central journal article supplement (PMC2748975)
Supplement: NIHMS126431-supplement-supplement_1.pdf [file NIHMS126431-supplement-supplement_1.pdf]

Type of file: figure

Label: 7

Filename: Supplemental\_Figure\_1.tif

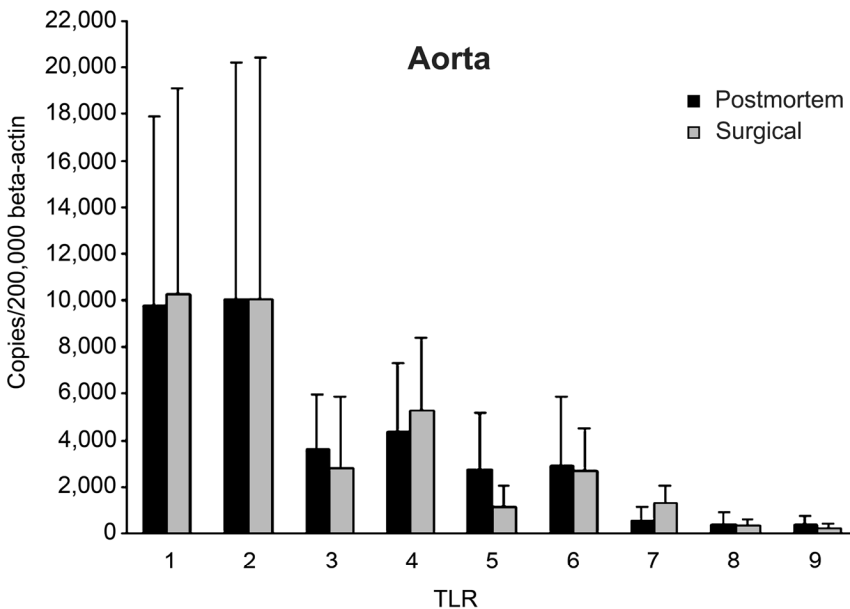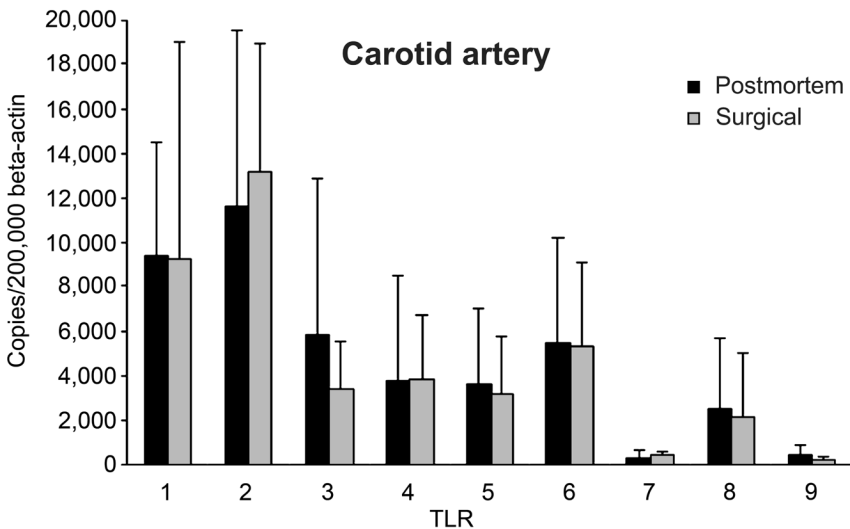

Type of file: figure

Label: 8

Filename: Supplemental\_Figure\_2.tif

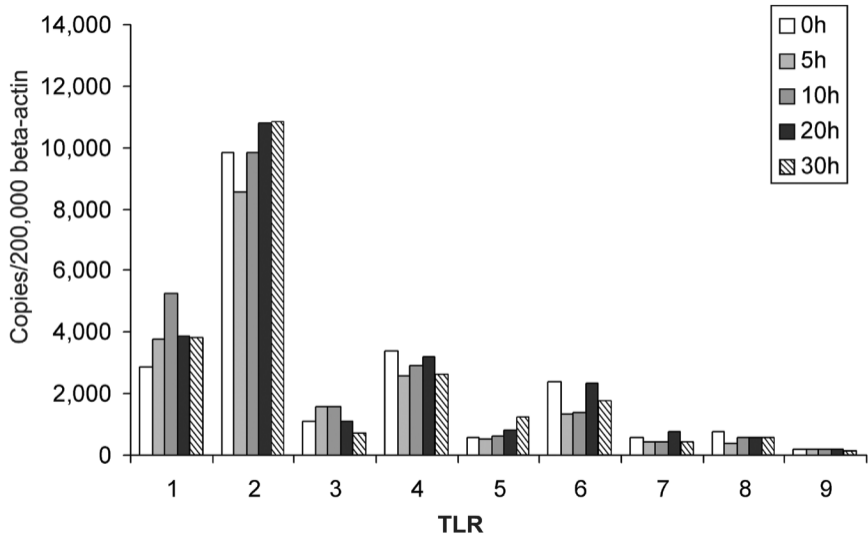

Type of file: table

Label: 1

Filename: Supplemental\_Table\_1.doc

Supplemental Table 1  
**PCR Primers**

| <b>Name</b>    | <b>Sense Sequence</b>      | <b>Antisense Sequence</b> | <b>Size</b> |
|----------------|----------------------------|---------------------------|-------------|
| $\beta$ -actin | ATGGCCACGGCTGCTTCCAGC      | CATGGTGGTGCCGCCAGACAG     | 237         |
| CD11c          | ACTTACTTACCCTCACCTGTCAGG   | AGGTAGAAATTGCAAGTCAAGTCC  | 202         |
| CD11b          | CACATGACTTTTCGGCGGATGA     | CACATGACTTTTCGGCGGATGA    | 174         |
| CD79A          | TGCCACCATCTTCCTCCTCT       | TTGGCGTTGTTGCTGCTATT      | 153         |
| TLR1           | CACATCAAGTGAAAAATATTCCTCC  | TAAATGGTGAAGTGCACCC       | 150         |
| TLR2           | GGCCAGCAAATTACCTGTGTG      | AGGCGGACATCCTGAACCT       | 67          |
| TLR3           | ATTGGGTCTGGGAACATTTCTCTTC  | GTGAGATTTAAACATTCCTCTTCGC | 320         |
| TLR4           | CTGCAATGGATCAAGGACCA       | TTATCTGAAGGTGTTGCACATTCC  | 74          |
| TLR5           | TGCCTTGAAGCCTTCAGTTATG     | CCAACCACCACCATGATGAG      | 76          |
| TLR6           | GAAGAAGAACAACCCTTTAGGATAGC | AGGCAAACAAAATGGAAGCTT     | 87          |
| TLR7           | TTACCTGGATGGAAACCAGCTACT   | TCAAGGCTGAGAAGCTGTAAGCTA  | 72          |
| TLR8           | GACCAAAGCTTCGAATTTAGC      | GTGGTTGCGTTTCGGTTTTAT     | 166         |
| TLR9           | TGAAGACTTCAGGCCCAACTG      | TGCACGGTCACCAGGTTGT       | 75          |
| CD83           | GTTATTGGAGGGTGGTGAAGAGAGG  | GTGAGGAGTCACTAGCCCTAAATGC | 448         |
| CD86           | GATTCGGACAGTTGGAC          | GTAACCGTGTATAGATGAGC      | 224         |
| CCL19          | CACCAATGATGCTGAAGACTGC     | CGGCGCTTCATCTTGGC         | 222         |
| TCR            | CCTTCAACAACAGCATTATTCCAG   | CGAGGGAGCACAGGCTGTCTTA    | 236         |
| CD40L          | GAAGGTTGGACAAGATAGAAGATG   | GCCCACTGTAACACAGATGTTG    | 280         |
| LT $\alpha$    | ACCTAGCTGGTGGACAAGACCA     | ACTGTCTTCTTTGGAGCCTTCG    | 269         |
| IFN $\gamma$   | ACCTTAAGAAATATTTTAATGC     | ACCGAATAATTAGTCAGCTT      | 270         |

Type of file: table

Label: 2

Filename: Supplemental\_Table\_2.doc

**Supplemental Table 2. Antibodies used in the study**

| <b>Antibody specificity</b> | <b>Clone</b> | <b>Source</b> | <b>Working dilution</b> |
|-----------------------------|--------------|---------------|-------------------------|
| CD11c                       | KB90         | Dako          | 1:200                   |
| CD86                        | BU63         | Dako          | 1:200                   |
| von Willebrand Factor       |              | Dako          | 1:1000                  |
| TLR2                        | TL2.1        | Biolegend     | 1:50                    |
| TLR4                        | HTA125       | Imgenex       | 1:50                    |
| TLR5                        | 19D759.2     | Imgenex       | 1:50                    |
| Goat anti-mouse secondary   | Polyclonal   | Dako          | 1:400                   |
| Sheep anti-rabbit secondary | Polyclonal   | Abcam         | 1:400                   |



Type of file: table

Label: 3

Filename: Supplemental\_Table\_3.doc

**Supplemental Table 3. DC positioning in different vascular beds.**

| <b>Artery</b>            | <b>Intima</b> | <b>Media</b> | <b>Adventitia</b> |
|--------------------------|---------------|--------------|-------------------|
| <b>Aorta</b>             | ++            | rare         | ++                |
| <b>Carotid artery</b>    | ++            | rare         | +                 |
| <b>Iliac artery</b>      | rare          | rare         | +                 |
| <b>Subclavian artery</b> | rare          | rare         | +                 |
| <b>Mesenteric artery</b> | rare          | rare         | +                 |
| <b>Temporal artery</b>   | absent        | rare         | +                 |

**Supplemental Table 3.** CD11c<sup>+</sup> vascular DC were identified as described in Fig. 1 in 7 different aortas, 7 carotid arteries, 5 iliac arteries, 7 subclavian arteries, 6 mesenteric arteries, and 5 temporal arteries. Cell counts were determined in circumferential sections throughout the intima, media, and adventitia of each vessel. ++ indicates 4-5 cells/hpf; + indicates 2-3 cells/hpf.

Type of file: table

Label: 4

Filename: Supplemental\_Table\_4.doc

**Supplemental Table 4. Responsiveness of venous and arterial tissues to TLR4 ligands.**

|        | <b>DC activation marker</b> | <b>Control (copy numbers)</b> | <b>LPS (copy numbers)</b> |
|--------|-----------------------------|-------------------------------|---------------------------|
| Vein   | CD83                        | 18±6                          | 25±12                     |
|        | CD86                        | ≤2                            | ≤2                        |
| Artery | CD83                        | 253±5                         | 692±93                    |
|        | CD86                        | 24±2                          | 120±5                     |

**Supplemental Table 4.** Venous and arterial semi-rings were stimulated with LPS or left untreated for 24 hours in organ culture as described. Total RNA was isolated from shock frozen tissues. The table shows the gene expression of DC activation markers CD83 and CD86 adjusted to  $\beta$ -actin. Numbers presented are averages of duplicate measurements  $\pm$  standard deviation.
